# Supplementary material
Source: MDPI journal article supplement (https://www.mdpi.com/2077-1312/8/12/1008)
Supplement: s1 [file s1]

## Sheet: Foglio1
Journal of Marine Science and Engineering - Marine Biology
A new species of Spongilla (Porifera, Demospongiae) from a karst lake in Ha Long Bay (Vietnam)
Barbara Calcinai · Carlo Cerrano · Laura Núñez-Pons · Maurizio Pansini · Do Cong Thung · Marco Bertolino
Barbara Calcinai
Department of Life and Environmental Sciences, Università Politecnica delle Marche, Ancona, Italy
e-mail: b.calcinai@univpm.it

## Sheet: COIs_Ref_Seqs
Supplementary Table S1. Table of reference sequences downloaded from GenBank database for COI marker gene of sponge species in the Family Spongillidae, plus Echinospongilla. brichardi and Oncosclera sp. as outgroups, with names, country codes and Accession numbers.
Species name & Country code	Accession Number		Country codes
Corvospongilla ultima MM	MF958996.1		BA – Bosnia - Herzegobina
Echinospongilla brichardi ZM	EU000573.1		CG – Congo
Ephydatia fluviatilis CN.1	KX620050.1		CN – China
Ephydatia fluviatilis CN.2	KU720128.1		DE – Germany
Ephydatia fluviatilis DE	DQ167174.1		HR – Croatia
Ephydatia fluviatilis HR	JN209966.1		ID – Indonesia
Ephydatia fluviatilis IN	KC860775.1		IE – Ireland
Ephydatia fluviatilis IT.1	JF340437.1		IL – Israel
Ephydatia fluviatilis IT.2	GQ411060.1		IN – India
Ephydatia fluviatilis USA.1	DQ176777.1		IT – Italy
Ephydatia fluviatilis USA.2	DQ087505.1		MN – Myanmar
Ephydatia muelleri DE.1	AJ843884.1		RU – Russia
Ephydatia muelleri DE.2	DQ167172.1		U.S.A.
Ephydatia muelleri DE.3	LT158504.1		VN – Vietnam
Ephydatia muelleri IT.1	GQ411062.1		ZM – Zimbabwe
Ephydatia muelleri IT.2	GQ411061.1
Ephydatia muelleri USA.1	DQ176778.1
Ephydatia muelleri USA.2	EU237481.1
Ephydatia muelleri USA.3	EU237481.1
Ephydatia sp. DE	DQ167173.1
Ephydatia syriaca IL.1	JN116246.1
Ephydatia syriaca IL.2	JN116245.1
Ephydatia syriaca IL.3	JN116244.1
Eunapius fragilis IN	MH319717.1
Eunapius fragilis USA.1	AJ843882.1
Eunapius fragilis USA.2	DQ176779.1
Eunapius fragilis USA.3	JX999059.1
Eunapius sp. CG.1	JF816199.1
Eunapius sp. CG.2	JF816200.1
Eunapius sp. CG.3	JF816203.1
Eunapius sp. CG.4	JF816204.1
Eunapius sp. CG.5	JF816205.1
Eunapius sp. CG.6	JF816208.1
Eunapius sp. CG.7	JF816209.1
Eunapius sp. CG.8	JF816210.1
Eunapius sp. CG.9	JF816211.1
Eunapius sp. DE	DQ167175.1
Eunapius sp. HR	DQ167181.1
Eunapius subterraneus HR.1	FJ715439.1
Eunapius subterraneus HR.2	GU086203.1
Eunapius subterraneus HR.3	GU086203.1
Oncosclera sp. CG.1	JF816201.1
Racekiela montemflumina MX	MF536526.1
Spongilla lacustris BA.1	KU759841.1
Spongilla lacustris DE.1	AJ843883.1
Spongilla lacustris DE.2	DQ167176.1
Spongilla lacustris DE.3	LT158503.1
Spongilla lacustris IE	HQ379431.1
Spongilla lacustris IN.1	KC860776.1
Spongilla lacustris IN.2	KC860777.1
Spongilla lacustris RU.1	EU000572.1
Spongilla lacustris RU.2	MH985289.1
Spongilla lacustris RU.3	MH985290.1
Spongilla lacustris RU.4	MH985291.1
Spongilla lacustris RU.5	MH985292.1
Spongilla manconiae VN	MT176773
Spongilla vastus ID.1	DQ167179.1
Spongilla vastus ID.2	DQ167180.1
Stratospongilla bombayensis IN	KC860779.1
Trochospongilla horrida DE	EF025854.1
Trochospongilla pennsylvanica USA	DQ087503.1

## Sheet: ITSs_Ref_Seqs
Supplementary Table S1. Table of reference sequences downloaded from GenBank database for ITS marker gene of sponge species in the Family Spongillidae, plus Echinospongilla. brichardi and Oncosclera sp. as outgroups, with names, country codes and Accession numbers.
Species name & Country code	Accession Number		Country codes
Echinospongilla brichardi ZM	EF418032.1		BA – Bosnia and Herzegobina
Ephydatia fluviatilis EE.1	KC244046.1		CG – Congo
Ephydatia fluviatilis EE.2	KC244028.1		CN – China
Ephydatia fluviatilis EE.3	KC244018.1		DE – Germany
Ephydatia fluviatilis EE.4	KC244014.1		EE – Estonia
Ephydatia fluviatilis EE.5	KC244012.1		HR – Croatia
Ephydatia fluviatilis EE.6	KC244006.1		ID – Indonesia
Ephydatia fluviatilis EE.7	KC243994.1		IE – Ireland
Ephydatia fluviatilis IT.3	EF534498.1		IL –
Ephydatia fluviatilis IT.4	EF534497.1		IN – India
Ephydatia fluviatilis RU.1	KX572201.1		IT – Italy
Ephydatia fluviatilis RU.2	EF151951.1		MN – Myanmar
Ephydatia fluviatilis RU.3	EF151942.1		MX – Mexico
Ephydatia fluviatilis USA.1	DQ178657.1		RU – Russia
Ephydatia muelleri DE.4	AY662506.1		U.S.A.
Ephydatia muelleri IT.3	EF534499.1		VN – Vietnam
Ephydatia muelleri IT.4	EF534500.1		ZM – Zimbabwe
Ephydatia muelleri RU.1	EF151932.1
Ephydatia muelleri RU.2	KX572183.1
Ephydatia muelleri RU.3	KX572184.1
Ephydatia muelleri USA.4	DQ178654.1
Ephydatia sp. IL.1	GU190369.1
Ephydatia sp. IL.2	GU190373.1
Ephydatia sp. IL.3	GU190376.1
Ephydatia sp. RU.1	AM950183.1
Ephydatia sp. RU.2	AM950187.1
Ephydatia sp. RU.3	FJ719108.1
Ephydatia sp. RU.4	GU250967.1
Ephydatia syriaca IL.1	JN116239.1
Ephydatia syriaca IL.2	JN116238.1
Ephydatia syriaca IL.3	JN116240.1
Eunapius conifer RU	EF151939.1
Eunapius fragilis RU	KX572210.1
Eunapius fragilis USA.1	DQ178651.1
Eunapius ryuensis RU	EF151948.1
Eunapius sinensis RU	EF151949.1
Eunapius sp. CG.1	JF816197.1
Eunapius sp. CG.2	JF816196.1
Eunapius sp. CG.3	JF816194.1
Eunapius sp. CG.4	JF816195.1
Eunapius sp. CG.5	JF816198.1
Eunapius sp. RU.1	EF151934.1
Eunapius sp. RU.2	EF151937.1
Eunapius sp. RU.3	EF151943.1
Eunapius sp. RU.4	EF151946.1
Eunapius sp. RU.5	EF151947.1
Eunapius sp. RU.6	EF151950.1
Eunapius sp. RU.7	AY662508.1
Eunapius subterraneus HR.1	FJ715436.1
Heterorotula multidentata RU.1	EF151933.1
Heterorotula multidentata RU.2	EF151936.1
Heterorotula multidentata RU.3	EF151940.1
Heterorotula multidentata RU.4	EF151941.1
Oncosclera sp. CG.1	JF816192.1
Racekiela cresciscrystae MX.1	MN953424.1
Racekiela cresciscrystae MX.2	MN953425.1
Racekiela sp. MX.1	MF535444.1
Racekiela sp. MX.2	MF535445.1
Racekiela sp. MX.3	MF535446.1
Radiospongilla cerebellata RU.1	EF151938.1
Radiospongilla cerebellata RU.2	EF151953.1
Radiospongilla crateriformis RU	EF151952.1
Radiospongilla sendaj RU	EF151954.1
Spongilla lacustris BA.1	KU863587.1
Spongilla lacustris DE.1	AJ703890.1
Spongilla lacustris DE.4	AY662505.1
Spongilla lacustris RU.10	KX572207.1
Spongilla lacustris RU.11	KX572209.1
Spongilla lacustris RU.2	KX572208.1
Spongilla lacustris RU.4	KX572206.1
Spongilla lacustris RU.6	EF151935.1
Spongilla lacustris RU.7	EF151944.1
Spongilla lacustris RU.8	EF151945.1
Spongilla lacustris RU.9	KX572205.1
Spongilla lacustris USA	DQ178653.1
Spongilla manconiae VN	MT177208
Trochospongilla latouchiana RU	EF151955.1
Trochospongilla pennsylvanica USA	DQ178650.1
